# Supplementary material for: RITAN: rapid integration of term annotation and network resources
Source: PeerJ journal article supplement (doi:10.7717/peerj.6994), 2019-07-19
Supplement: RITAN_software_supplemental_data.zip [file RITAN_software_supplemental_data.zip]

# Relationships Among Resources

*Michael T. Zimmermann*

*2018-05-02*

## Identify relationships between genesets

A feature of RITAN is the ability to account for false-discovery rates across resources. However, the relationships among genesets is not always obvious. That is, two resources may each have a term that is highly similar if not identical to the other. Ideally, you would pick one of these terms to use, prior to analysis. The function `geneset_overlap()` helps with this process by identifying terms that have considerable overlap and merging them.

```
library(RITANdata)
```

```
library(RITAN)
```

```
# Show the fraction of genes common to multiple disease-gene relationships.
```

```
o <- geneset_overlap( geneset_list$DisGeNet )
```

```
plot( density(c( o[upper.tri(o)] )), log='y', ylim = c(1e-3, 1e3),  
      main='', xlab='Fraction Shared Genes', ylab='Prob()')
```

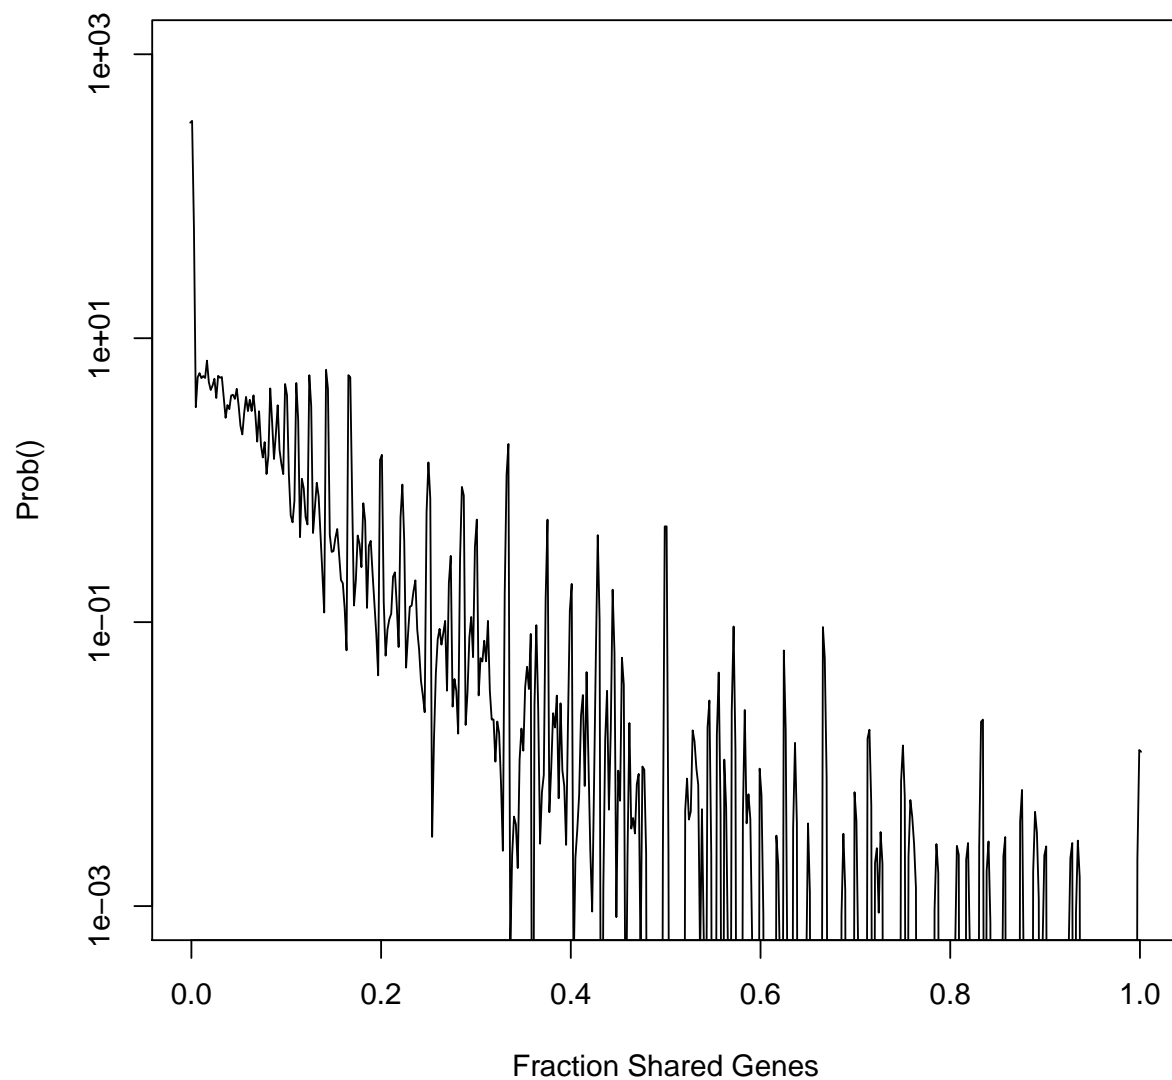

```
# Show the diseases and their gene-level overlap, when each disease has some overlap of at least 80%.
diag(o) <- NA # ignore self-overlap
i <- which( o > 0.8, arr.ind = TRUE )
mat <- o[ unique(i[,1]), unique(i[,2]) ]
heatmap( mat, col = rev(gray(seq(0,1,length.out = 15))),
         cexRow=.7, cexCol=0.7, margins = c(7,7) )
```

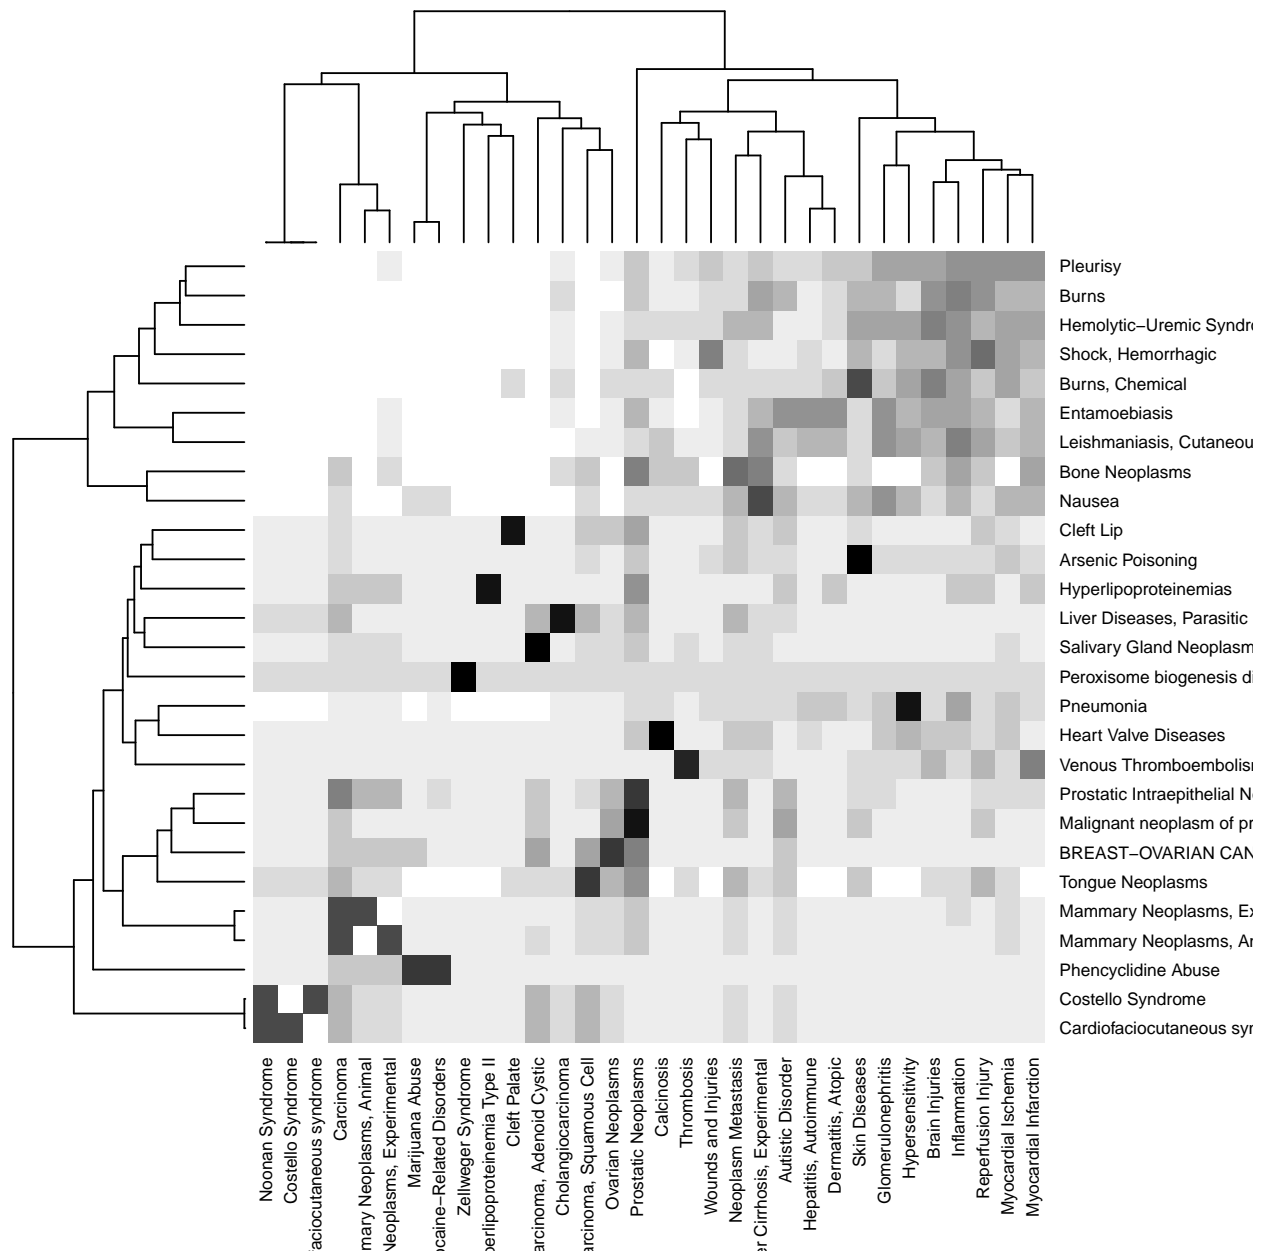

```
# Show the fraction of genes common between disease-gene relationships and GO-Slim term definitions
o <- geneset_overlap( geneset_list$DisGeNet, geneset_list$GO_slim_generic )
o <- o[ , !( colnames(o) %in% c('biological_process', 'molecular_function', 'cellular_component')) ] #
plot( density(c(o)), log='y',
      main='', xlab='Fraction Shared Genes', ylab='Prob()')
```

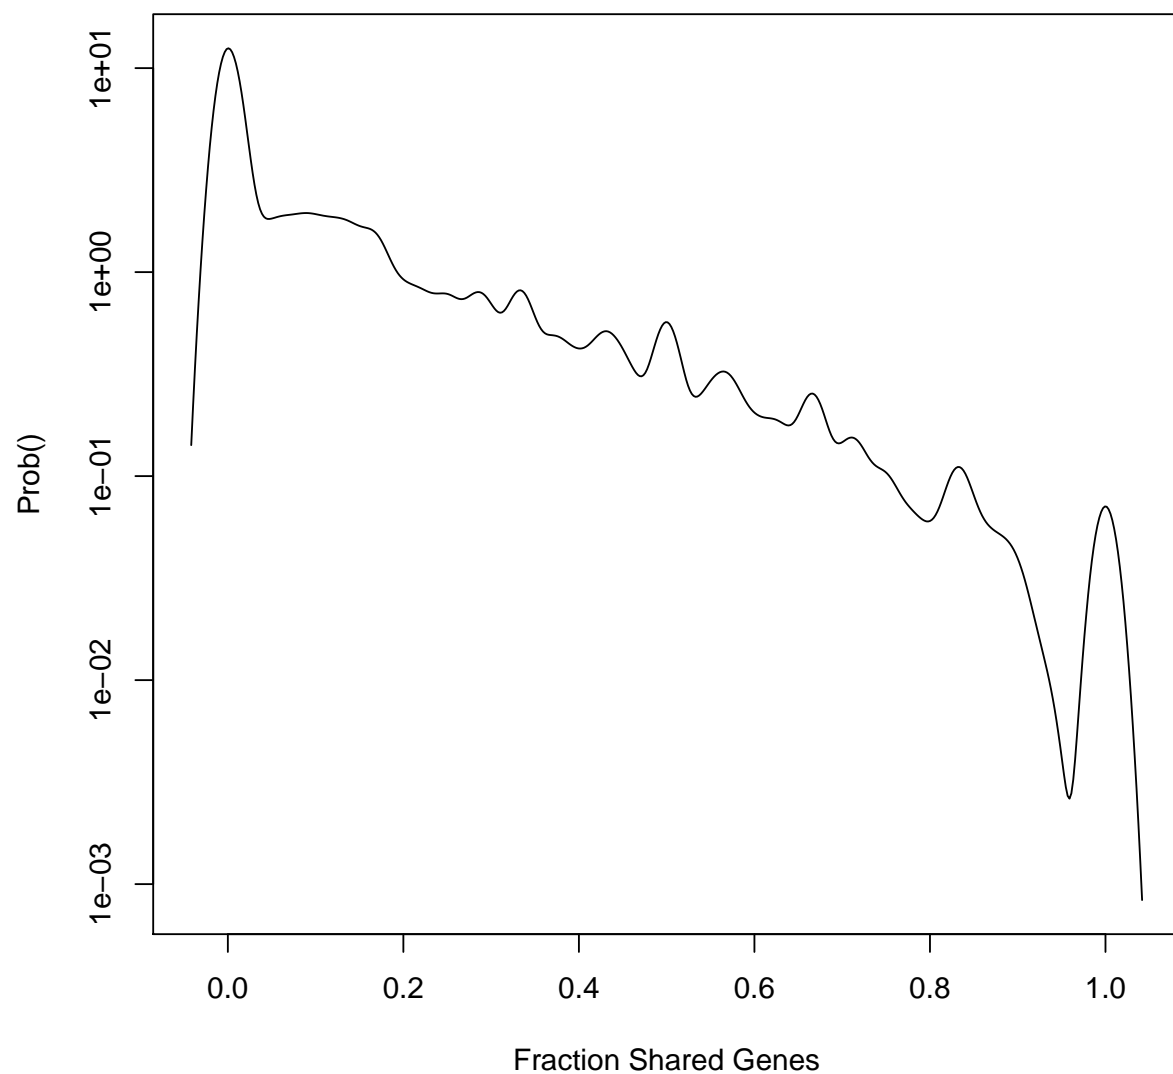

```
# Show the heatmap for relationships where a disease and term share 95% of genes in common
i <- which( o > 0.95, arr.ind = TRUE )
mat <- o[ unique(i[,1]), unique(i[,2]) ]
heatmap( mat, col = rev(gray(seq(0,1,length.out = 15))),
         cexRow=.7, cexCol=0.7, margins = c(7,7) )
```



Thus, having many term resources in one place, such as RITAN, facilitates knowledge integration.

Features such as these can be combined to investigate the relationships among knowledge resources and the results used in further studies.

The combination of diseases and function relationships (e.g. diseases related to cell motility) can be combined to make a new geneset. This new geneset can then be used within `term_enrichment()` to annotate your own datasets.

```
d <- rownames(o)[ o[ , "cell_motility" ] > 0.66 ]
str(d)

## chr [1:20] "Kartagener Syndrome" "Thromboembolism" ...
new_geneset <- intersect( unique(unlist(geneset_list$DisGeNet[d])),
                          unique(unlist(geneset_list$GO_slim_generic$cell_motility)) )
str(new_geneset)

## chr [1:86] "CCDC40" "DNAH5" "DNAI1" "DRC1" "DYX1C1" "F2" "F7" "GAS6" ...
```

**We have made a function named `resource_reduce`, to assist users in focusing on the unique portion of geneset resources.**

```
unique_diseases <- resource_reduce( geneset_list$DisGeNet )

##
## The input list had 604 terms/genesets.
## The 55 terms with overlaps of 0.80 were merged into 22 composite terms.
## The updated term list with 571 terms will be returned.

unique_disease_slim <- resource_reduce( c(geneset_list$DisGeNet, geneset_list$GO_slim_generic), min_overlap = 0.80 )

##
## The input list had 746 terms/genesets.
## The 326 terms with overlaps of 0.95 were merged into 29 composite terms.
## The updated term list with 449 terms will be returned.
```

After running `resource_reduce()`, the new terms/genesets share less than `min_overlap` fraction of genes. If `min_overlap` is set to a high threshold, there will still be strong relatedness within the dataset, but redundant terms will be merged. If `min_overlap` is set to a lower threshold, the resulting terms will be largely independent, but it is likely that they will be a smaller number of very large terms/genesets (many mergers).

The multiple testing correction used in RITAN will be overly conservative if there are relationships between the terms used.

How stringent to be depends on your application - how the data will be annotated and interpreted.
